# Supplementary material for: Curcumin inhibits type III secretion of Pseudomonas aeruginosa
Source: PeerJ. 2025 Jul 24;13:e19725. doi: 10.7717/peerj.19725 (PMC12296563; doi:10.7717/peerj.19725)
Supplement: Supplemental Information 2 [file peerj-13-19725-s002.xlsx]

## Sheet: Hoja1
Strains	Isolation Year	Patient sex	Patient age (years)	Clinical sample
P001	2011	Male	41	Quantitative biopsy
P665	2014	Female	32	Endotracheal aspirate
P699	2014	Male	38	Urine
H311	2015	Male	65	Blood culture
P240	2013	Male	30	Endotracheal aspirate
H326	2015	Male	81	Blood culture
H330	2015	Male	65	Blood culture
P347	2013	Male	34	Blood culture
P044	2011	Female	33	Bronchoalveolar lavage
P076	2012	Female	53	Urine
P193	2012	Male	20	Endotracheal aspirate
INP-30R	2016	Female	17	Expectoration
INP-37R	2016	Male	7	Bronchoalveolar lavage
INP-44M	2016	Female	9	Nasopharyngeal aspirate
INP-48M	2016	Female	˂1	Bronchoalveolar lavage
INP-49R	2016	Male	16	Sputum
INP-57R	2016	Female	8	Bronchial secretion
INP-58M	2016	Female	2	Bronchial secretion
INP-62	2016	Male	5	Sputum
INP-64	2016	Male	6	Sputum
