# Supplementary figures and images for: Curcumin inhibits type III secretion of Pseudomonas aeruginosa
Source: PeerJ journal article supplement (doi:10.7717/peerj.19725), 2025-07-24

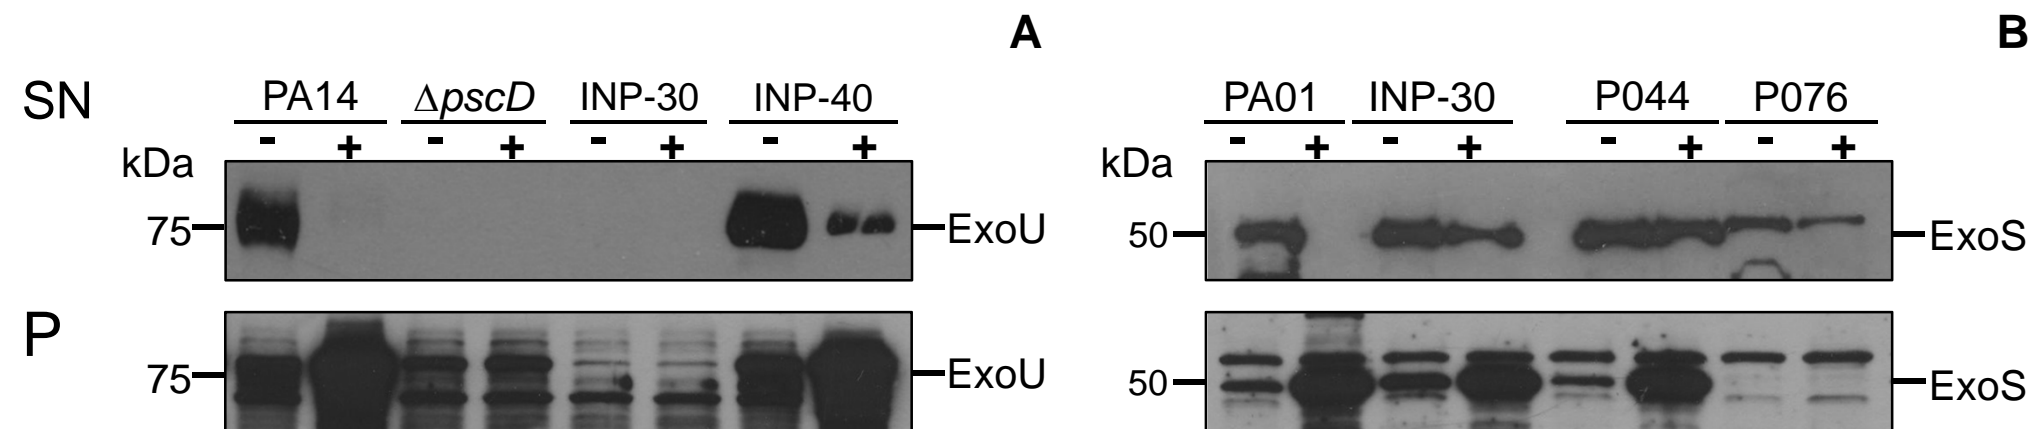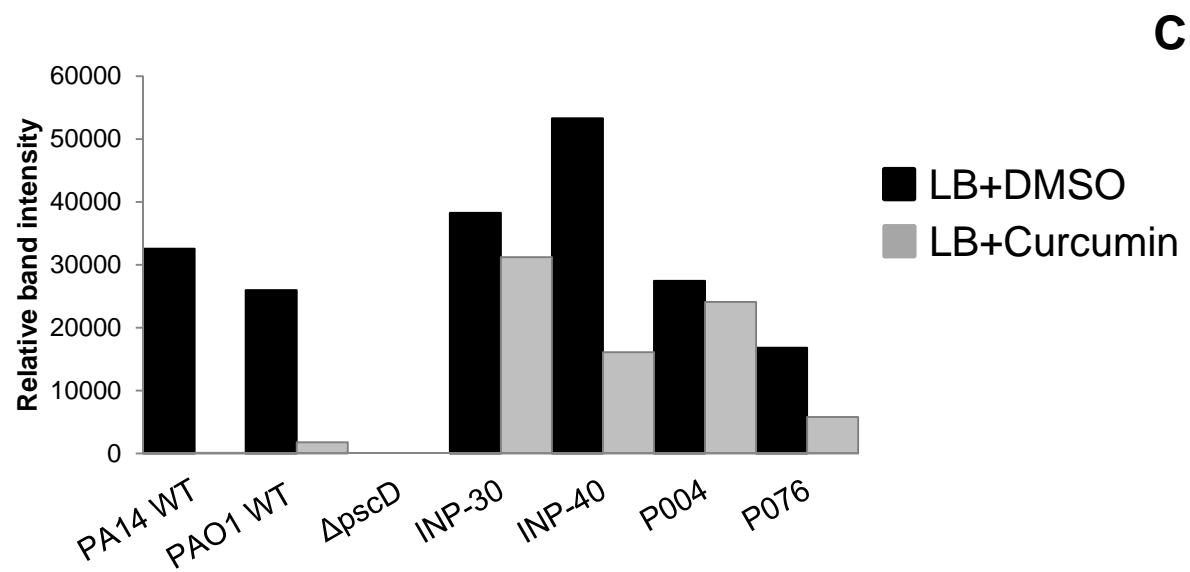

Supplement: crude_data_and_blots.zip [file crude_data_and_blots.zip]

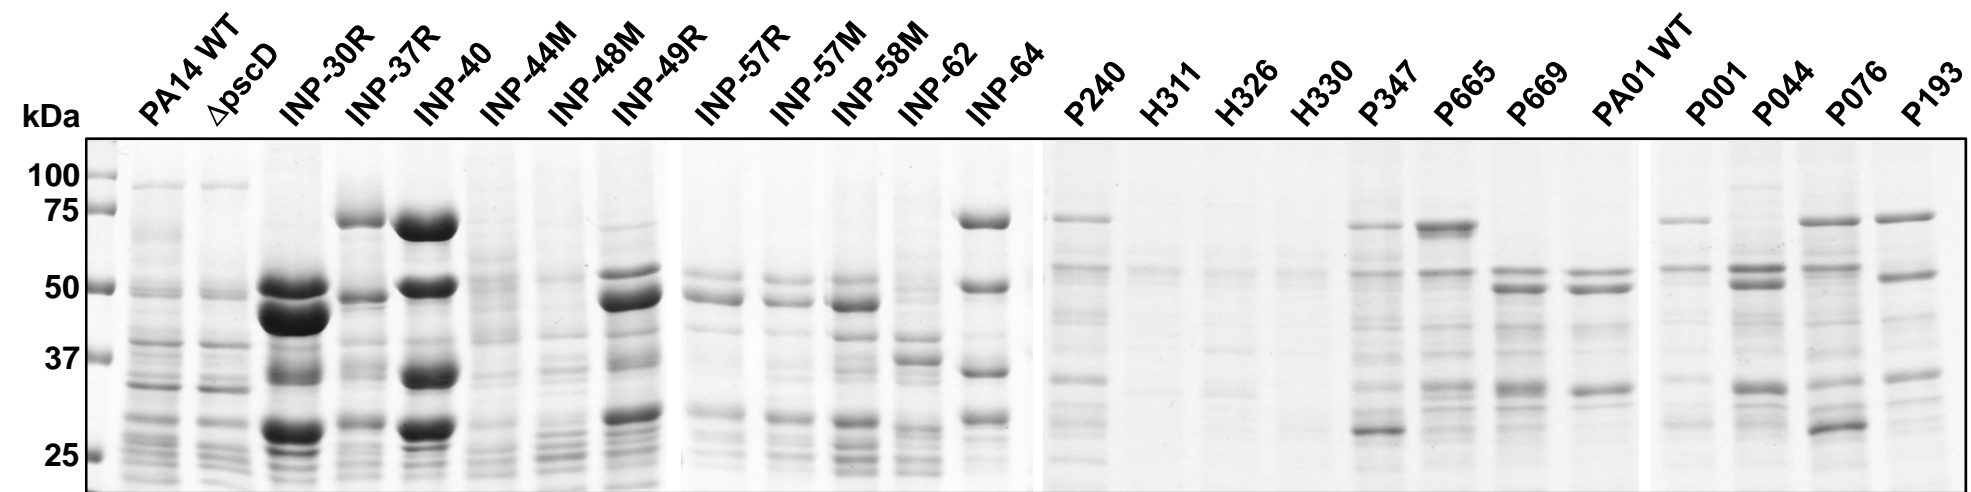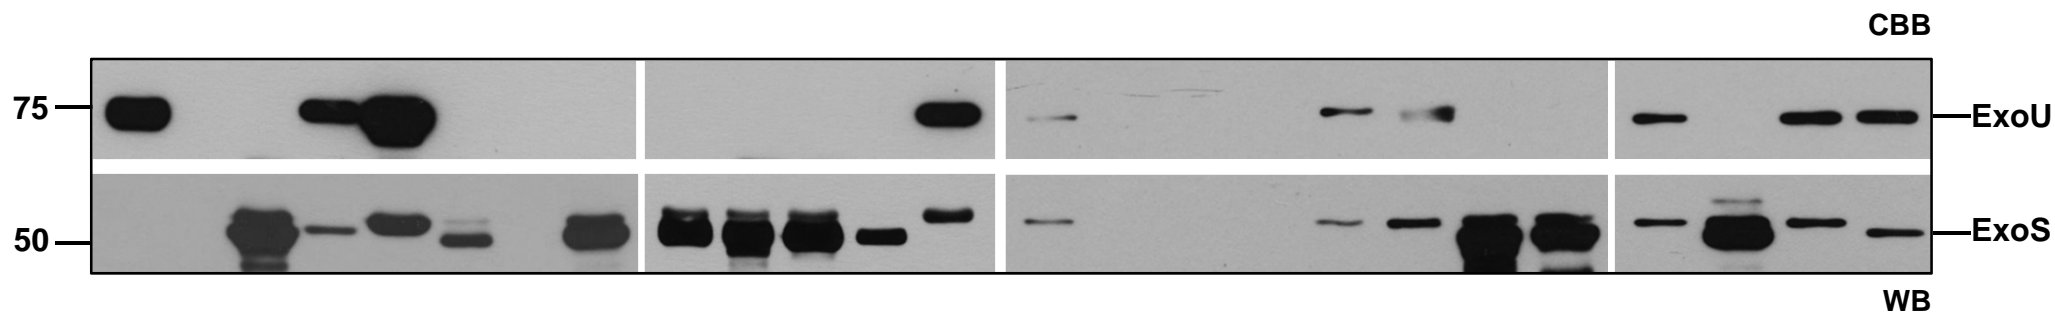

Supplement: crude_data_and_blots.zip [file crude_data_and_blots.zip]

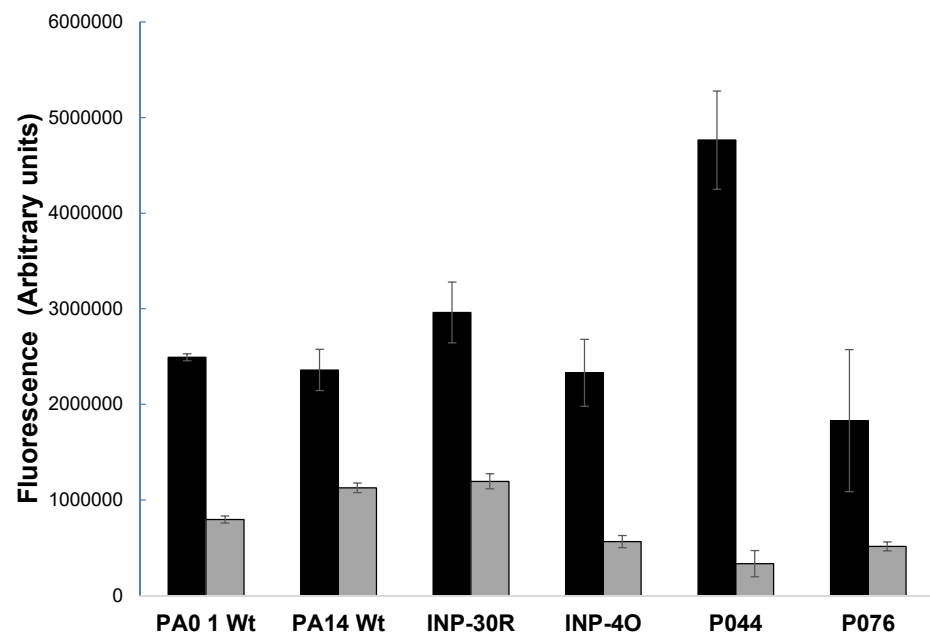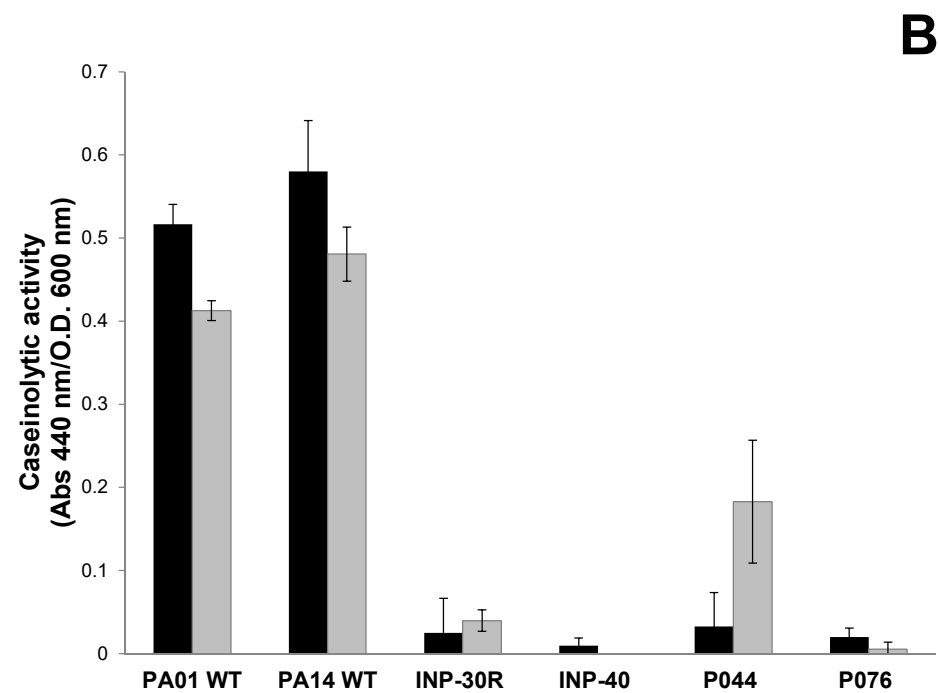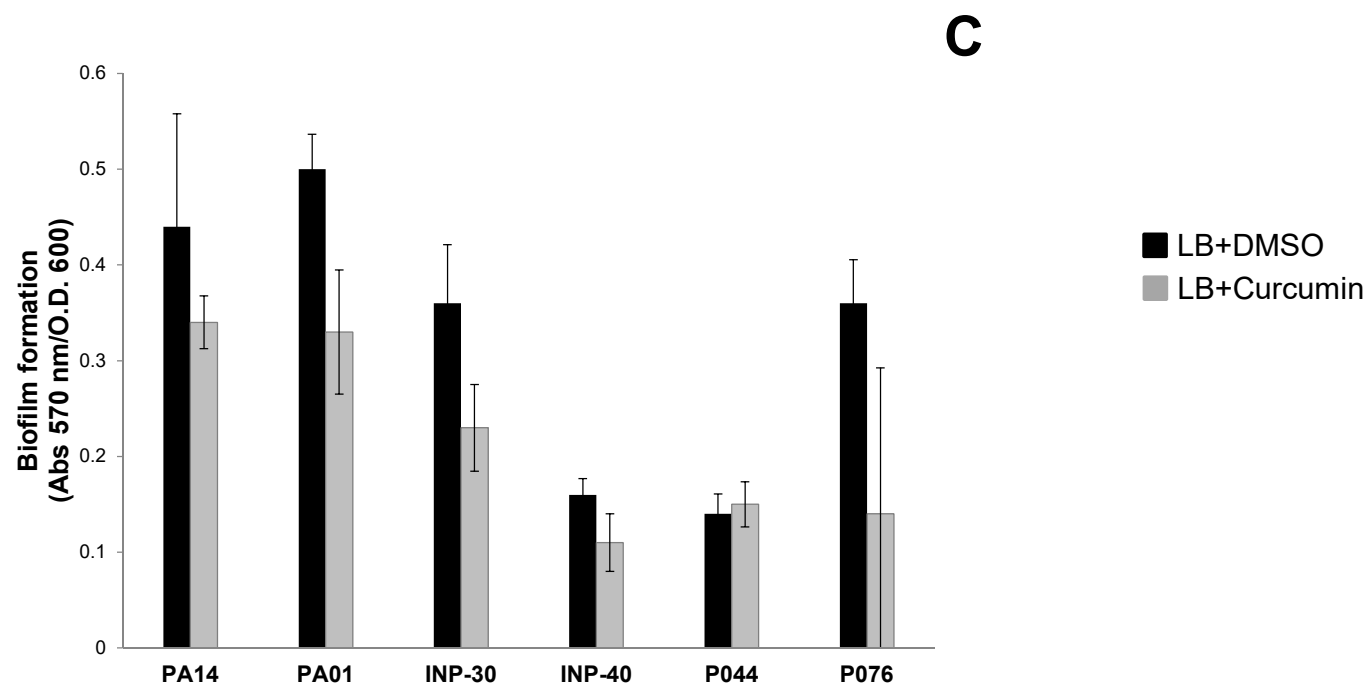

Supplement: crude_data_and_blots.zip [file crude_data_and_blots.zip]
